# Supplementary material
Source: PubMed Central journal article supplement (PMC3438316)
Supplement: NIHMS371289-supplement-1.pdf [file NIHMS371289-supplement-1.pdf]

## Supplemental information

### Matrix IGF-1 regulates bone mass by activation of mTOR in

#### Mesenchymal Stem Cells

Lingling Xian, Xiangwei Wu, Lijuan Pang, Michael Lou, Clifford Rosen, Tao Qiu, Janet Crane, Frank Frassica, Liming Zhang, Juan Pablo Rodriguez, Xiaofeng Jia, Shoshana Yakar Shouhong Xuan, Argiris Efstratiadis, Mei Wan and Xu Cao

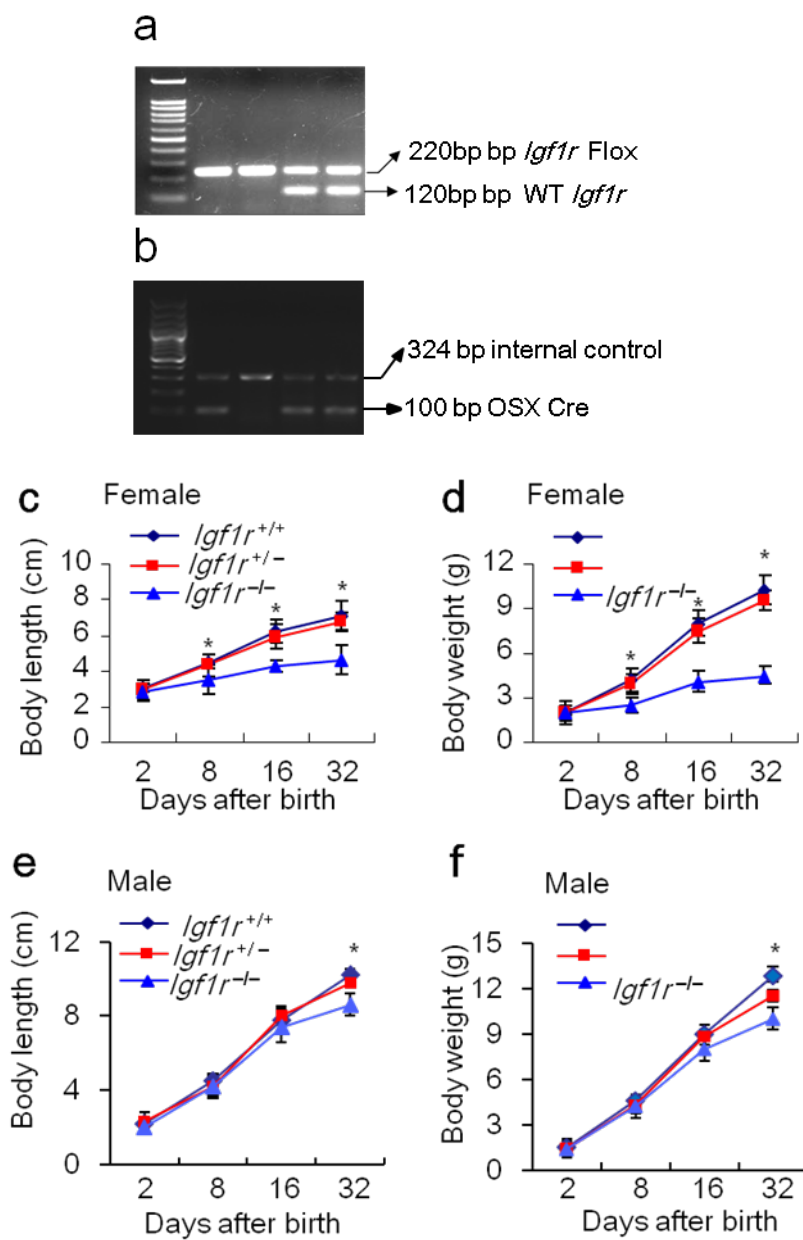

Supplementary Figure 1

**Generation of *Igf1r<sup>-/-</sup>* (*Osx-Cre; Igf1r<sup>fl/fl</sup>*) and wild type *Igf1r<sup>+/+</sup>* (*Osx-Cre; Igf1r<sup>+/+</sup>*) mice. (a) Genotyping of the floxed and wild-type *Igf1r* alleles were conducted by PCR using specific primers, forward primer: 5'-CTTCCCAGCTTGCTACTCTAGG-3' and reverse primer: 5'-CAGGCTTGCAATGAGACATGGG-3'. The primers amplified the region spanning the downstream loxP sequence. (b) Genotyping of Cre transgenic mice was performed by PCR using primers detecting the Cre sequence. (c-f) Body length and body weight of male and female *Igf1r<sup>+/+</sup>*, *Igf1r<sup>+/-</sup>* and *Igf1r<sup>-/-</sup>* mice were measured at different age points. Data represent the mean  $\pm$  SEM ( $n = 10$ ). \* $p < 0.05$**

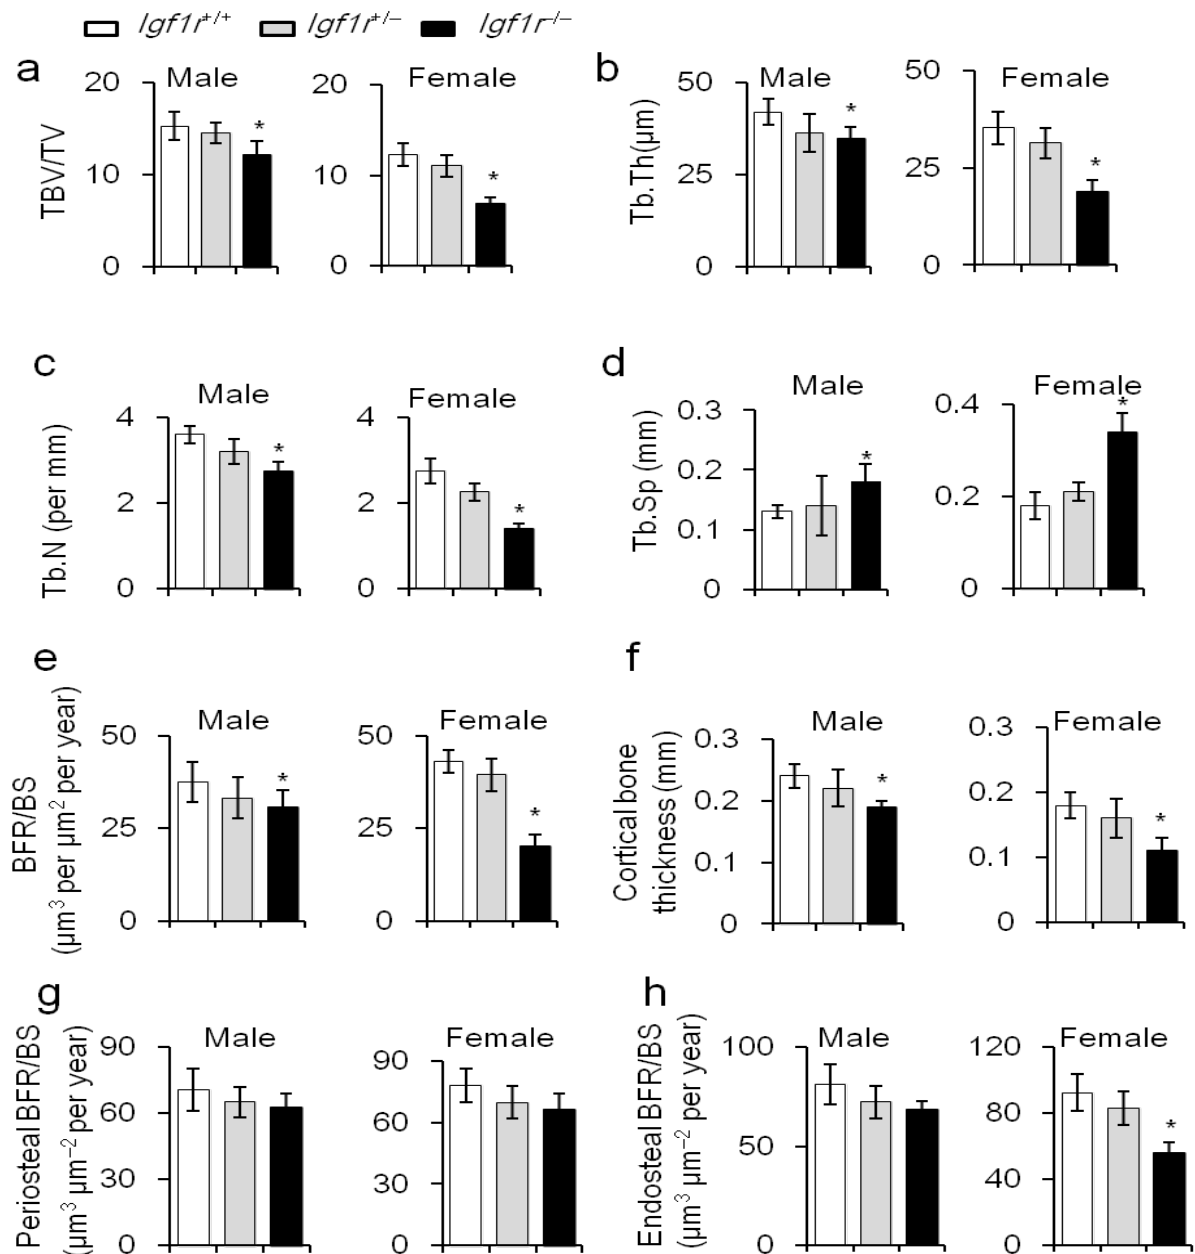

**Supplementary Figure 2**

**Histomorphometrical analysis of *Igf1r<sup>-/-</sup>* (*Osx-Cre; Igf1r<sup>fl/fl</sup>*) mice in the secondary spongiosa of proximal tibiae and cortical bone of the tibial**

**diaphysis.** (a) Trabecular bone volume fraction (TBV/TV), (b) Trabecular Thickness(Tb.Th), (c) Trabecular number (Tb. N), (d) Trabecular Separation (Tb. Sp), (e) Bone formation rate per bone surface (BFR/BS), (f) Cortical bone thickness, (g) Periosteal bone formation rate per bone surface, (h) Endosteal bone formation rate per bone surface. Data represent the mean  $\pm$  SEM. Female:  $n = 7-10$ . Male: 18-22. \* $p < 0.05$

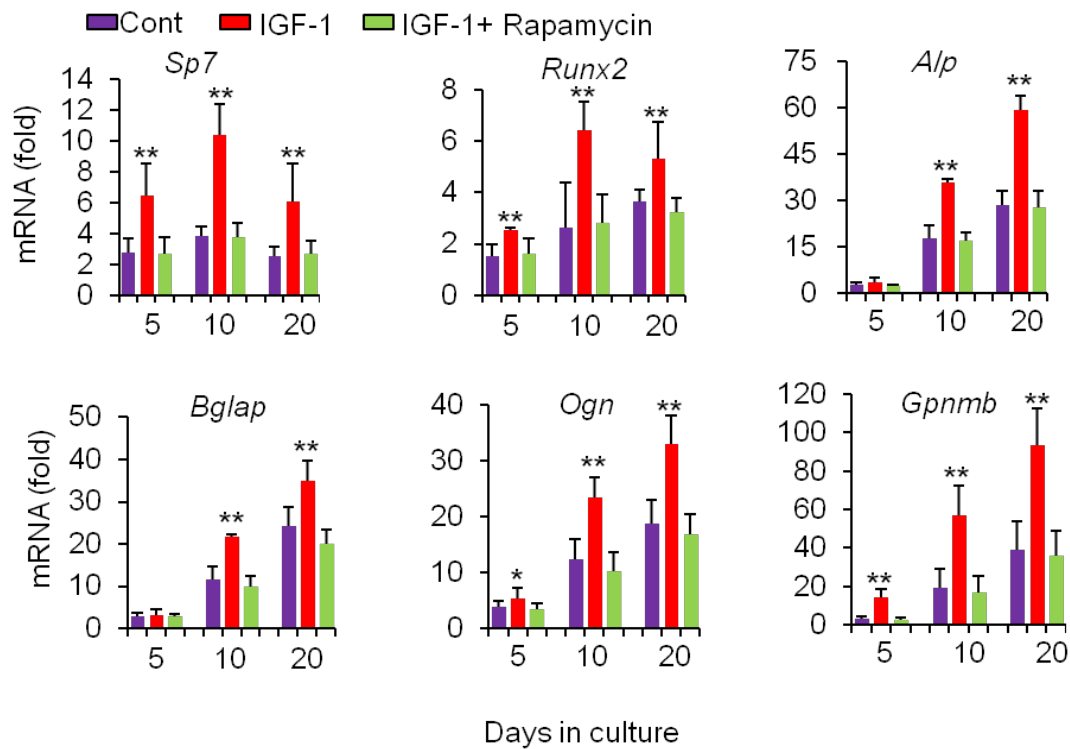

### Supplementary Figure 3

**Rapamycin inhibits expression of osteoblastic differentiation markers induced by IGF-1.** MSCs were plated at 1,000 cells per well in 6-well plates in the presence or absence of IGF-1(100 ng ml<sup>-1</sup>) with or without rapamycin (20 nM) in low serum differentiation medium. mRNAs of Osterix (*Sp7*), Runx2, Alkaline phosphatase (*Alp*), Osteocalcin (*Bglap*), Osteoglycin (*Ogn*), and Osteonectin (*Gpnmb*) were assayed by real-time PCR at indicated time points. Data represent the mean  $\pm$  SEM.  $n = 5$  \* $P < 0.05$ ; \*\* $P < 0.01$ .

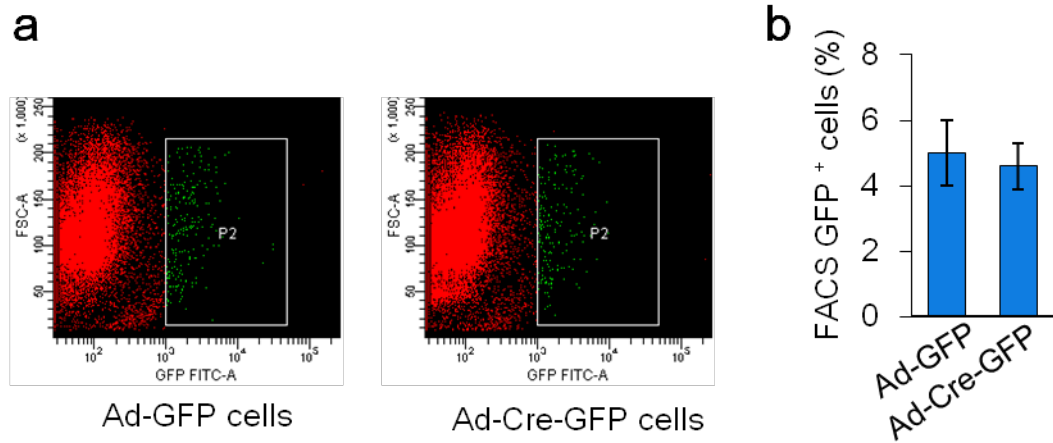

**Supplementary Figure 4**

**Survival rate of the transplanted GFP<sup>+</sup> Sca-1<sup>+</sup> MSCs infected with Ad-Cre-GFP or Ad-GFP in the bone marrow cavity. (a)** GFP<sup>+</sup> cells from bone marrow and compact bones 2 weeks after transplantation were assessed by flow cytometry analysis. **(b)** Percentage of GFP<sup>+</sup> cells in bone marrow. Data represent the mean  $\pm$  SEM, (  $n = 3$  ).

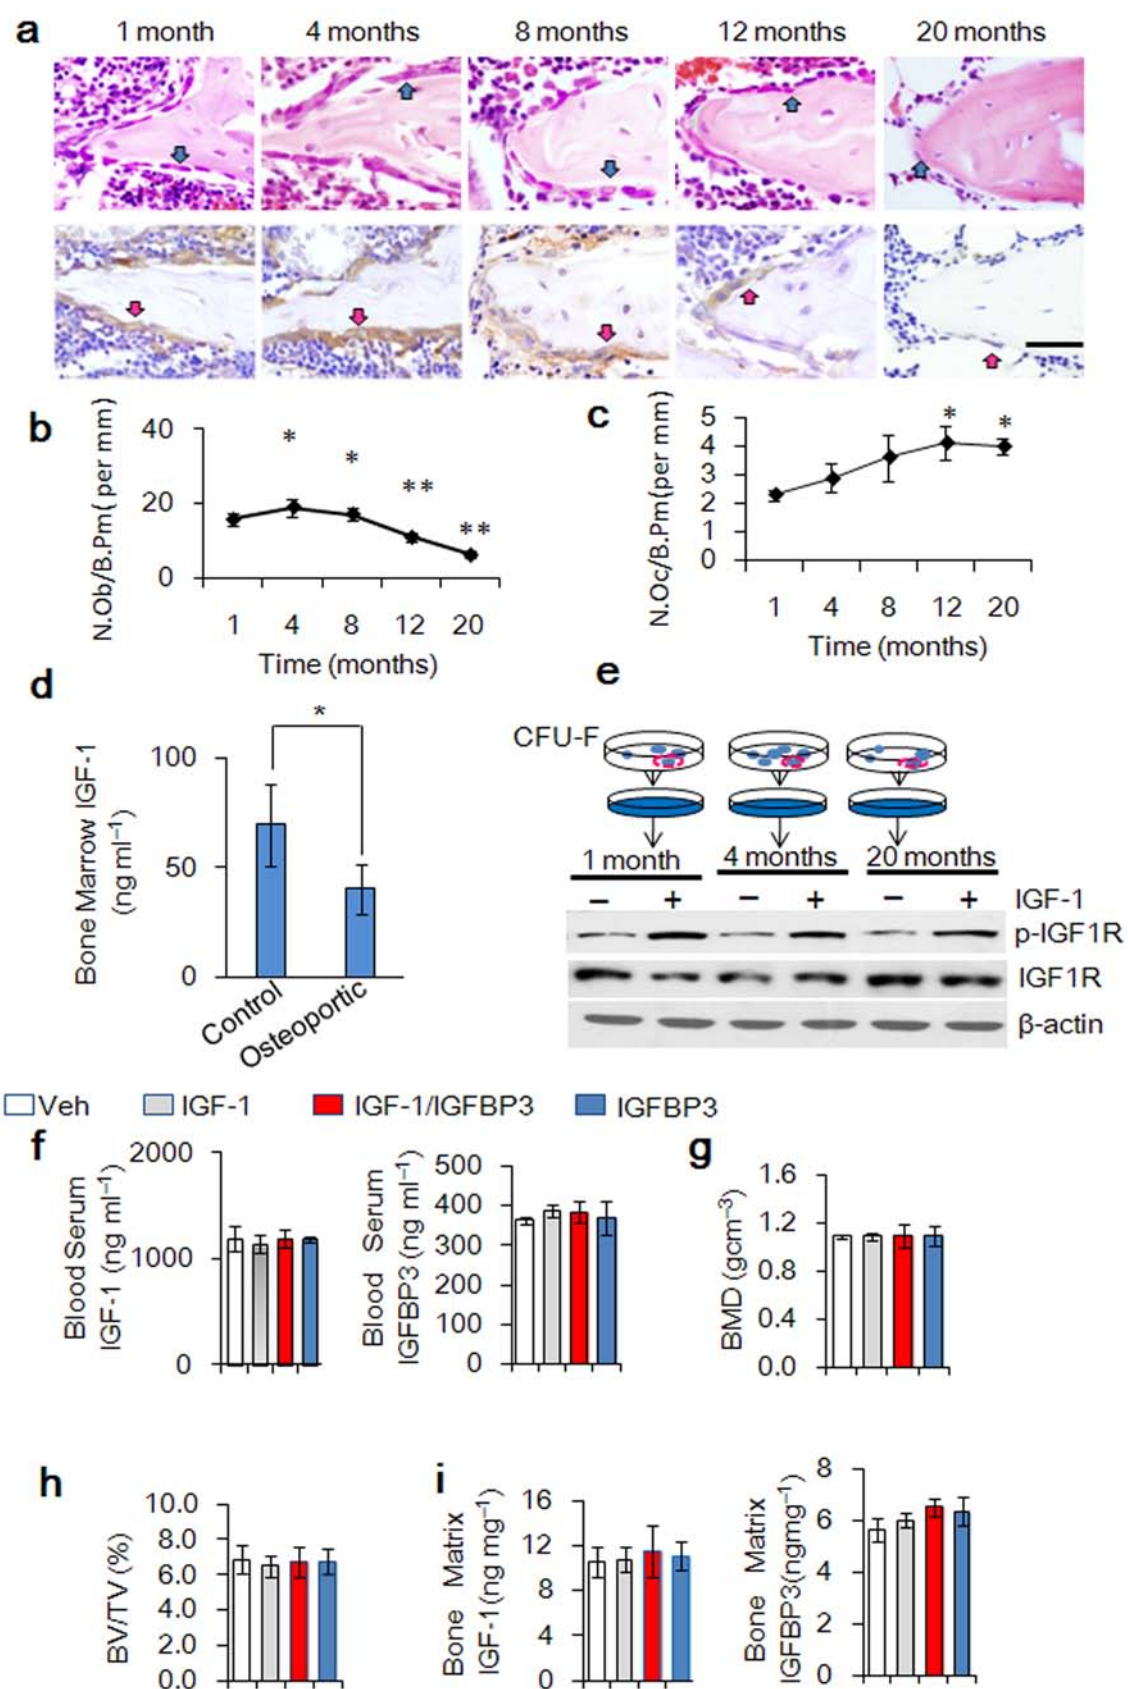

Supplementary Figure 5

**Age-related bone change assays from rats and its association with IGF-1 in the bone matrix** (a) H&E staining (**top panels**) and immunohistology using antibody against Osteocalcin (**bottom panels**) of rat femur sections from mice at different ages as indicated. Arrows indicate osteoblasts. (b, c) Quantification of osteoblasts and osteoclasts in trabecular bone from mice with different ages. Number of osteoblast per bone perimeter (N.Ob/B.Pm); Number of osteoclast per bone perimeter (N.Oc/B.Pm); (d) Bone marrow IGF-1 concentration in osteoporotic individual ( $n=12$ ) and comparative controls ( $n=12$ ). Data represent mean  $\pm$  SEM.  $*p < 0.05$ . (e) Effects of IGF-1 treatment ( $20 \text{ ng ml}^{-1}$  for 10 minutes) on the levels of phosphorylated IGF1R *in vitro* cultured MSCs detected by western blot utilizing antibodies. Data represent the mean  $\pm$  SEM.  $*p < 0.05$ . (f) IGF-1(**left**) and IGFBP3 (**right**) concentrations in blood serum from rats injected with vehicle, IGF-1, IGF-1 plus IGFBP3 or IGFBP3 only. Data represent the mean  $\pm$  SEM.  $n = 10$ . (g–i)  $\mu$ CT analysis and measurement of the IGF-1 and IGFBP3 concentrations in bone matrix of the uninjected right femurs from the mice with injection of vehicle, IGF-1, IGF-1 plus IGFBP3 or IGFBP3 only in the left femurs. (g, h) Quantitative  $\mu$ CT analysis of the distal femora. Trabecular volumetric bone mineral density (TBMD) (g) and trabecular bone volume fraction (TBV/TV) (h). (i) Concentrations of IGF-1 (**left**) and IGFBP3 (**right**) in bone matrix extraction. Data represent the mean  $\pm$  SEM.  $n = 10$ .  $*p < 0.05$ .

**Supplementary Table 1  $\mu$ CT analysis of distal femurs from mice with rapamycin injection**

|                                                        | Veh               | Rapamycin             |
|--------------------------------------------------------|-------------------|-----------------------|
| Trabecular bone volume<br>BV/TV (%)                    | $9.5 \pm 0.42$    | $6.94 \pm 0.54^{**}$  |
| Bone mineralized density<br>BMD ( $\text{g cm}^{-3}$ ) | $1.30 \pm 0.07$   | $1.12 \pm 0.03^{**}$  |
| Mean trabecular pattern factor<br>Tb.pf (per mm)       | $9.2 \pm 0.88$    | $7.70 \pm 1.9^*$      |
| Trabecular separation<br>Tb.Sp (mm)                    | $0.2 \pm 0.06$    | $0.32 \pm 0.078^{**}$ |
| Trabecular thickness<br>Tb.Th (mm)                     | $0.017 \pm 0.008$ | $0.012 \pm 0.002^*$   |
| Trabecular number<br>Tb.N (per mm)                     | $6.7 \pm 1.2$     | $4.2 \pm 0.63^*$      |

Data represent the mean  $\pm$  SEM.  $n = 8$ .  $*p < 0.05$ ,  $**p < 0.01$

**Supplementary Table 2 Clinical characteristics of human samples**

|                                          | Control   | Osteoportic |
|------------------------------------------|-----------|-------------|
| Age (years)                              | 72.1±6.9  | 72.8±9.4    |
| Weight (kg)                              | 67.7±11.9 | 56.3±10.8** |
| Height (cm)                              | 153.7±6.8 | 150.9±6.4   |
| BMD (g cm <sup>-2</sup> )                | 1.19±0.2  | 0.8±0.1**   |
| t-score (L2-L4)                          | -0.68±1.4 | -3.6±0.8**  |
| z-score (L2-L4)                          | 1.03±1.3  | -1.5±0.7**  |
| BMI (kg m <sup>-2</sup> )                | 28.1±4.7  | 25.4±3.4*   |
| Fat (%)                                  | 42.0±7.8  | 32.3±15.2*  |
| Bone marrow IGF-1 (ng ml <sup>-1</sup> ) | 69.8±18.7 | 40.3±11.1*  |

Data represent the mean ± SEM. *n* = 12. \**p* < 0.05, \*\* *p* < 0.01.

**Supplementary Table 3  $\mu$ CT Analysis of the distal femurs from vehicle, IGF-1, or IGF-1 plus IGFBP3-infused LID mice**

|                                | WT           | LID                       |                           |                         |
|--------------------------------|--------------|---------------------------|---------------------------|-------------------------|
|                                |              | Veh                       | IGF-1                     | IGF-1/IGFBP3            |
| Trabecular bone volume         |              |                           |                           |                         |
| BV/TV (%)                      | 7.62±0.29    | 6.98±0.18 <sup>#</sup>    | 7.01±0.24 <sup>#</sup>    | 8.36±0.25 <sup>#*</sup> |
| Bone mineralized density       |              |                           |                           |                         |
| BMD (g cm <sup>-3</sup> )      | 1.31±0.04    | 1.2±0.02 <sup>#</sup>     | 1.19±0.05 <sup>#</sup>    | 1.34±0.04*              |
| Trabecular number              |              |                           |                           |                         |
| Tb.N (per mm)                  | 3.67±0.40    | 3.37±0.11                 | 3.16±0.17                 | 3.79±0.14*              |
| Trabecular thickness           |              |                           |                           |                         |
| Tb.Th (mm)                     | 0.019±0.0002 | 0.016±0.0008 <sup>#</sup> | 0.015±0.0006 <sup>#</sup> | 0.019±0.007*            |
| Mean trabecular pattern factor |              |                           |                           |                         |
| Tb.pf (per mm)                 | 15.29±3.26   | 16.64±3.36                | 16.71±2.08                | 15.61±1.21              |
| Trabecular separation          |              |                           |                           |                         |
| Tb.Sp (mm)                     | 0.187±0.014  | 0.194±0.009               | 0.192±0.007               | 0.176±0.013*            |

Data represent the mean ± SEM. *n* = 6. <sup>#</sup>*p* < 0.05 vs WT, \* *p* < 0.01 vs Veh.
